# Supplementary material for: Highly disordered and resorbable lithiated nanoparticles with osteogenic and angiogenic properties
Source: Royal Society of Chemistry journal article supplement (doi:10.1039/d4tb00978a), 2024-01-01
Supplement: d4tb00978a1.pdf [file d4tb00978a1.pdf]

| Gene name                 | Forward primer                | Reverse primer                    |
|---------------------------|-------------------------------|-----------------------------------|
| <b><i>GAPDH</i></b>       | 5'-CTCTGCTCCTCCTGTTGAC-3'     | 3'-GTTTCTCTCCGCCGTCTTC-5'         |
| <b><i>Runx2</i></b>       | 5'-ATGCTTCATTGCTCAC-3'        | 3'-ACTGCTTGACGCTTAAAT-5'          |
| <b><i>Collagen I</i></b>  | 5'-GGTCCCAACGAGATCGAGATCCG-3' | 3'-TACAGGAAGCAGACAGGGCCAACGTCG-5' |
| <b><i>Osteocalcin</i></b> | 5'-ATGAGAGCCCTCACACTCCTCG-3'  | 3'-GTCAGCCAACCTCGTCACAGTCC-5'     |
| <b><i>EGF</i></b>         | 5'-TGGTTCCTTCTGTGTCAATCC-3'   | 3'-GTACTCTCGCAGGAAATGGG-5'        |
| <b><i>VEGF</i></b>        | 5'-CTGCTGTCTTGGGTGCATTG3'     | 5'-GGCACGACCGCTTACCTT-3'          |
| <b><i>Angiogenin</i></b>  | 5'-GCAGCGAATAAGTAC TG GC-3'   | 5'-CAG AGA CTA CCC CTG GCT GA-3'  |

**Table S1.** Sequences of primers used for RT-PCR.

### Supplementary figures

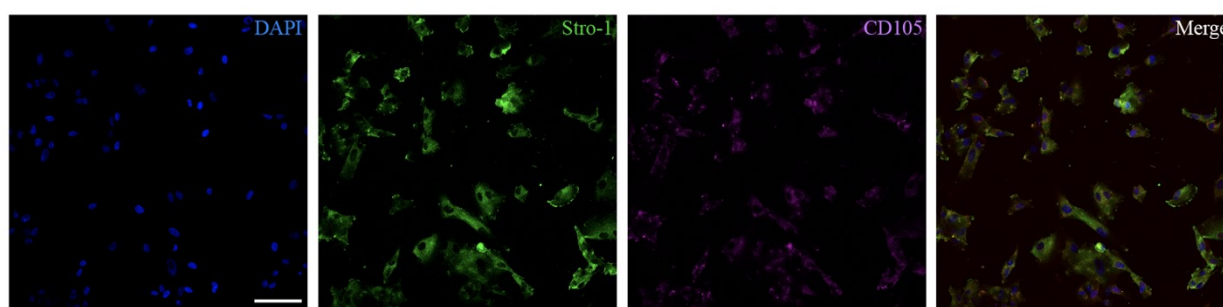

**Figure S1.** Immunofluorescence staining image of BM-MSCs expressing Stro-1 (green) and CD105 (purple). Scale bar = 100  $\mu$ m.

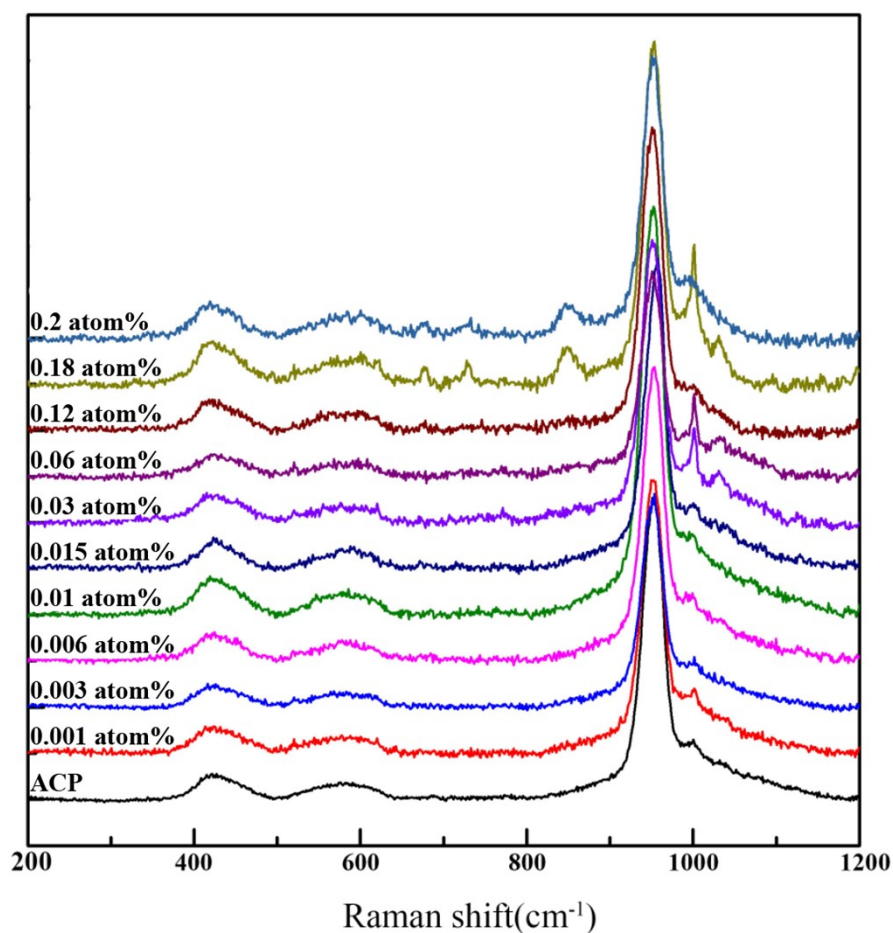

Figure S2. Raman spectra of ACP and ACP doped with different concentrations of lithium.

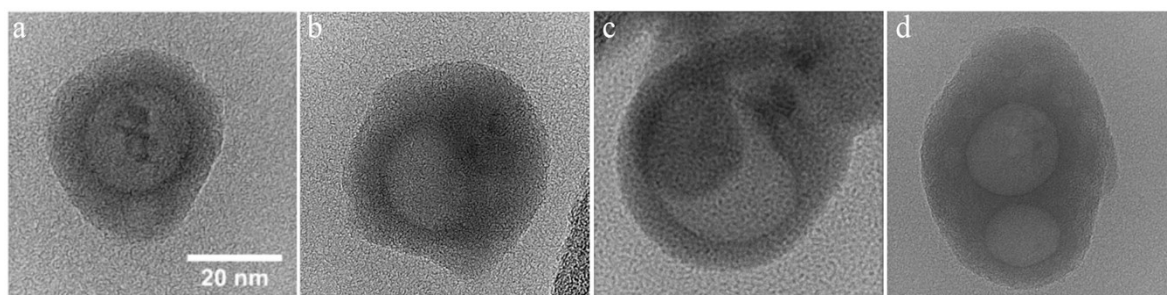

Figure S3 - TEM micrograph of (a) LiCP (ACP-0.2 atom% Li), (b) ACP- 0.12 atom% Li, (c) ACP-0.03 atom% Li , and (d) ACP, demonstrating noticeable size differences by addition of lithium into the structure of ACP.

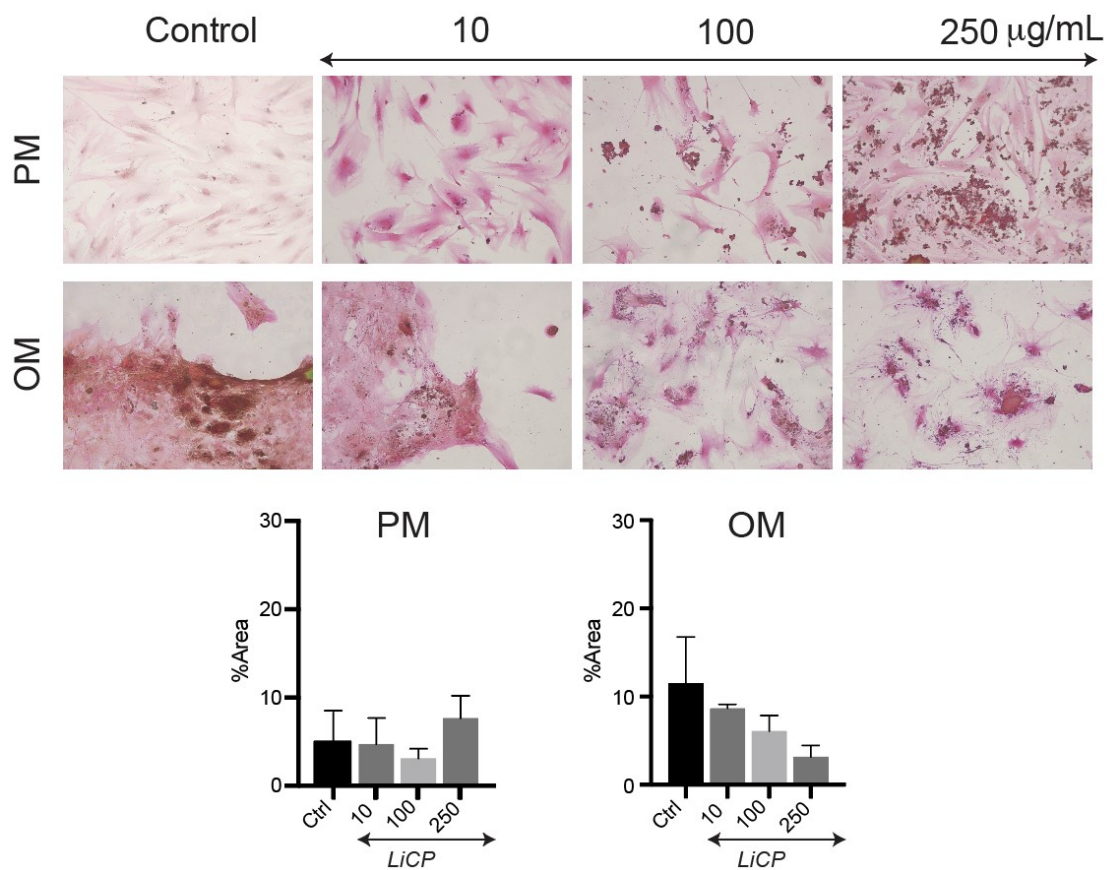

**Figure S4.** Picrosirius staining for total collagen detection at day 7 in proliferation (PM) or osteogenic (OM) medium, either in absence (Control) or presence (10, 100, 250  $\mu\text{g}/\text{mL}$ ) of LiCP nanoparticles, and relative quantification.

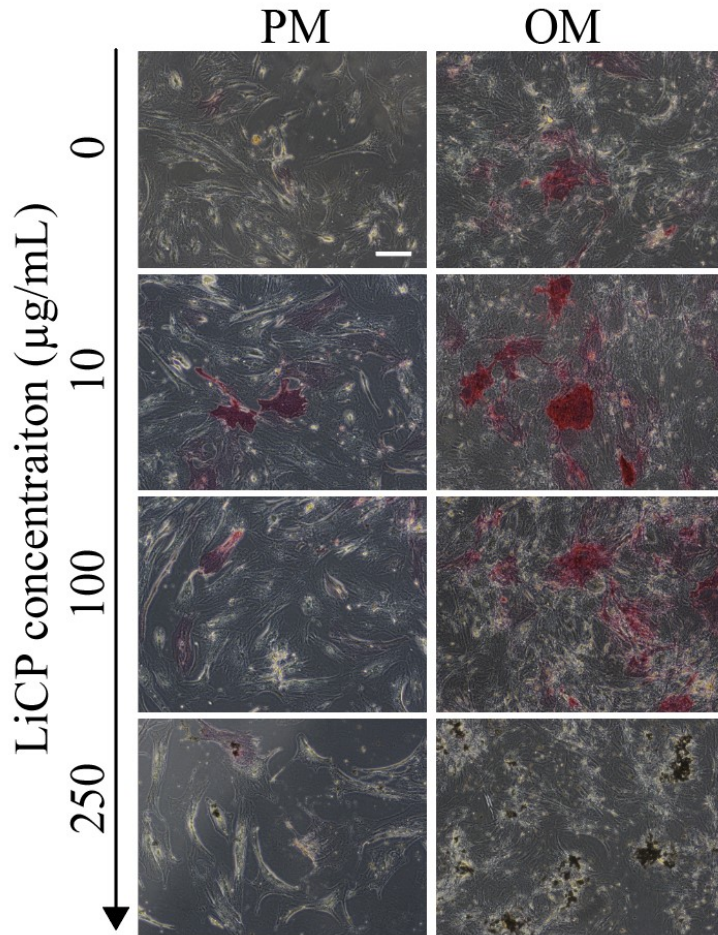

**Figure S5.** ALP staining at day 14, either in proliferation medium (PM) or osteogenic medium (OM). Scale bar: 100 µm.

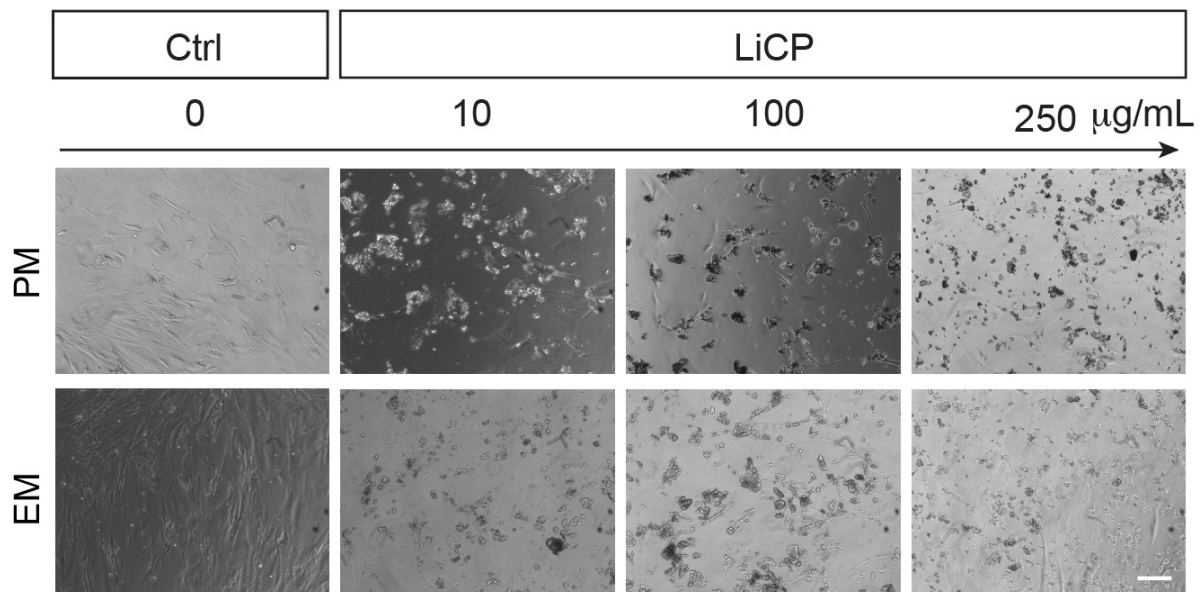

**Figure S6.** BM-MSCs morphology in proliferation medium (PM) and endothelial medium (EM) medium in combination with LiCP at different concentrations. Scale bar: 100 µm.
